# Supplementary material
Source: PubMed Central journal article supplement (PMC5757842)

## Supplementary Online Content

Mu EW, Lewin JM, Stevenson ML, Meehan SA, Carucci JA, Gareau DS. Use of digitally stained multimodal confocal mosaic images to screen for nonmelanoma skin cancer. *JAMA Dermatol*. Published online September 7, 2016. doi:10.1001/jamadermatol.2016.2997.

**eAppendix.** Training module: evaluation of digitally stained multimodal confocal mosaics for screening non-melanoma skin cancer

This supplementary material has been provided by the authors to give readers additional information about their work.

# Training Module

Evaluation of Digitally Stained Multimodal Confocal Mosaics for  
Screening Non-melanoma Skin Cancer

# Negative Margin Example 1

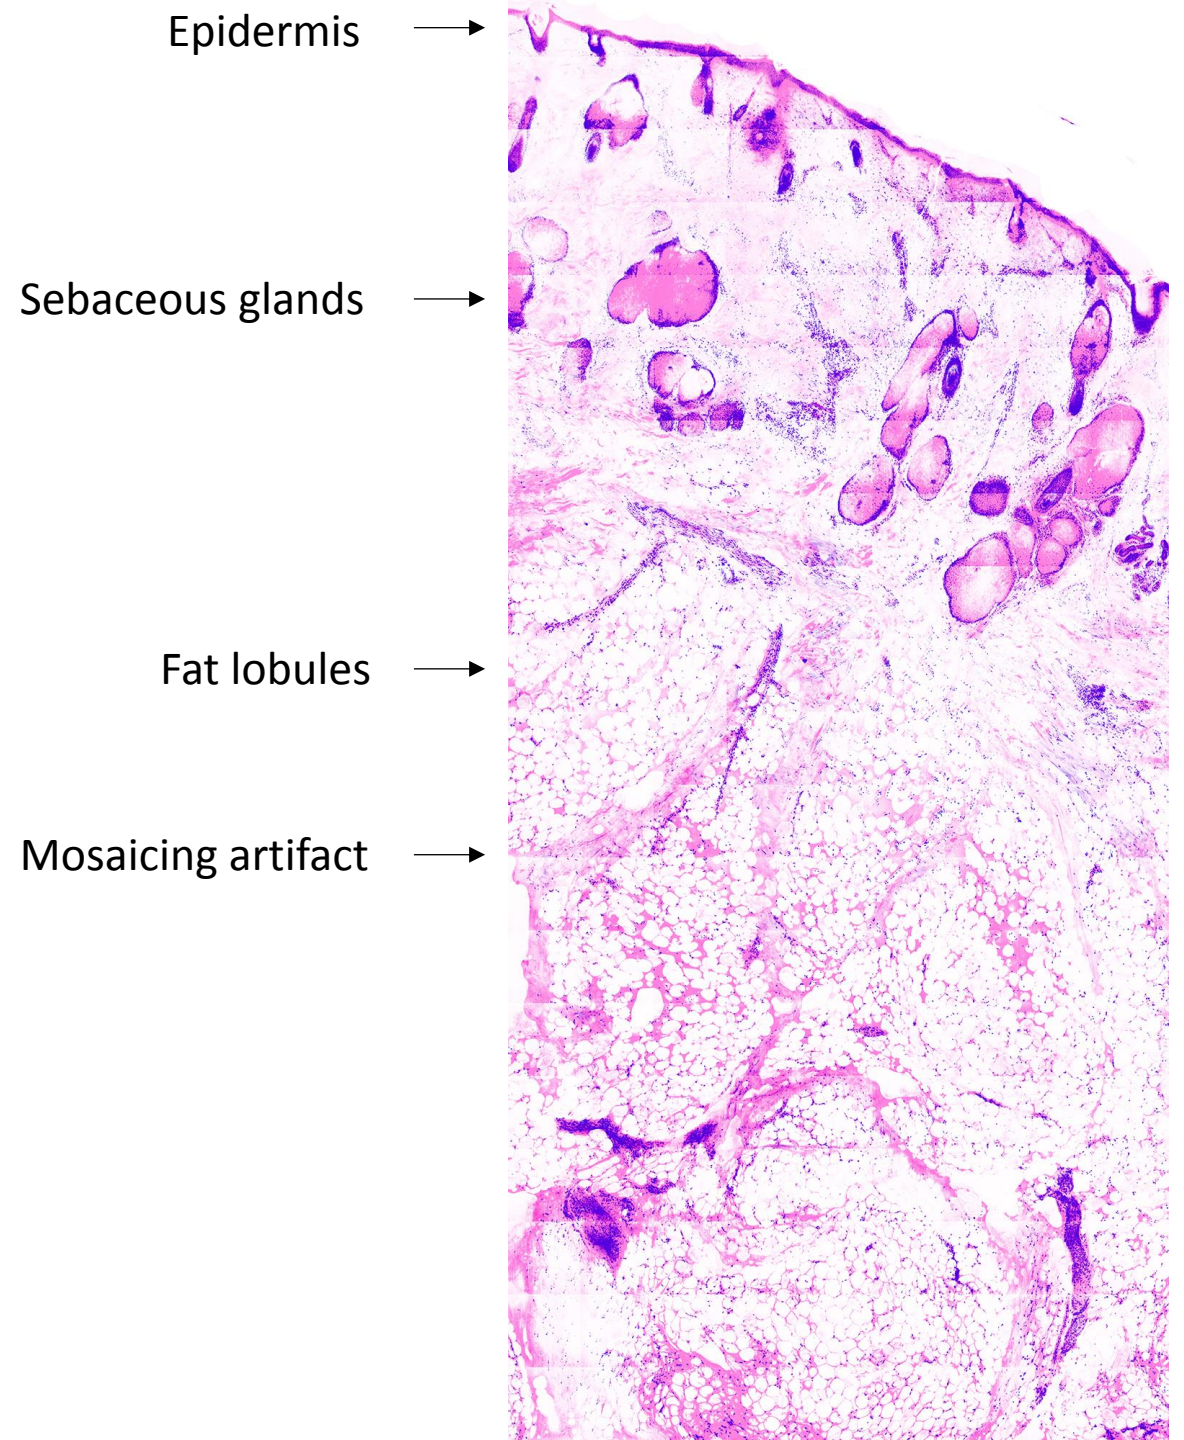

# Negative Margin Example 2

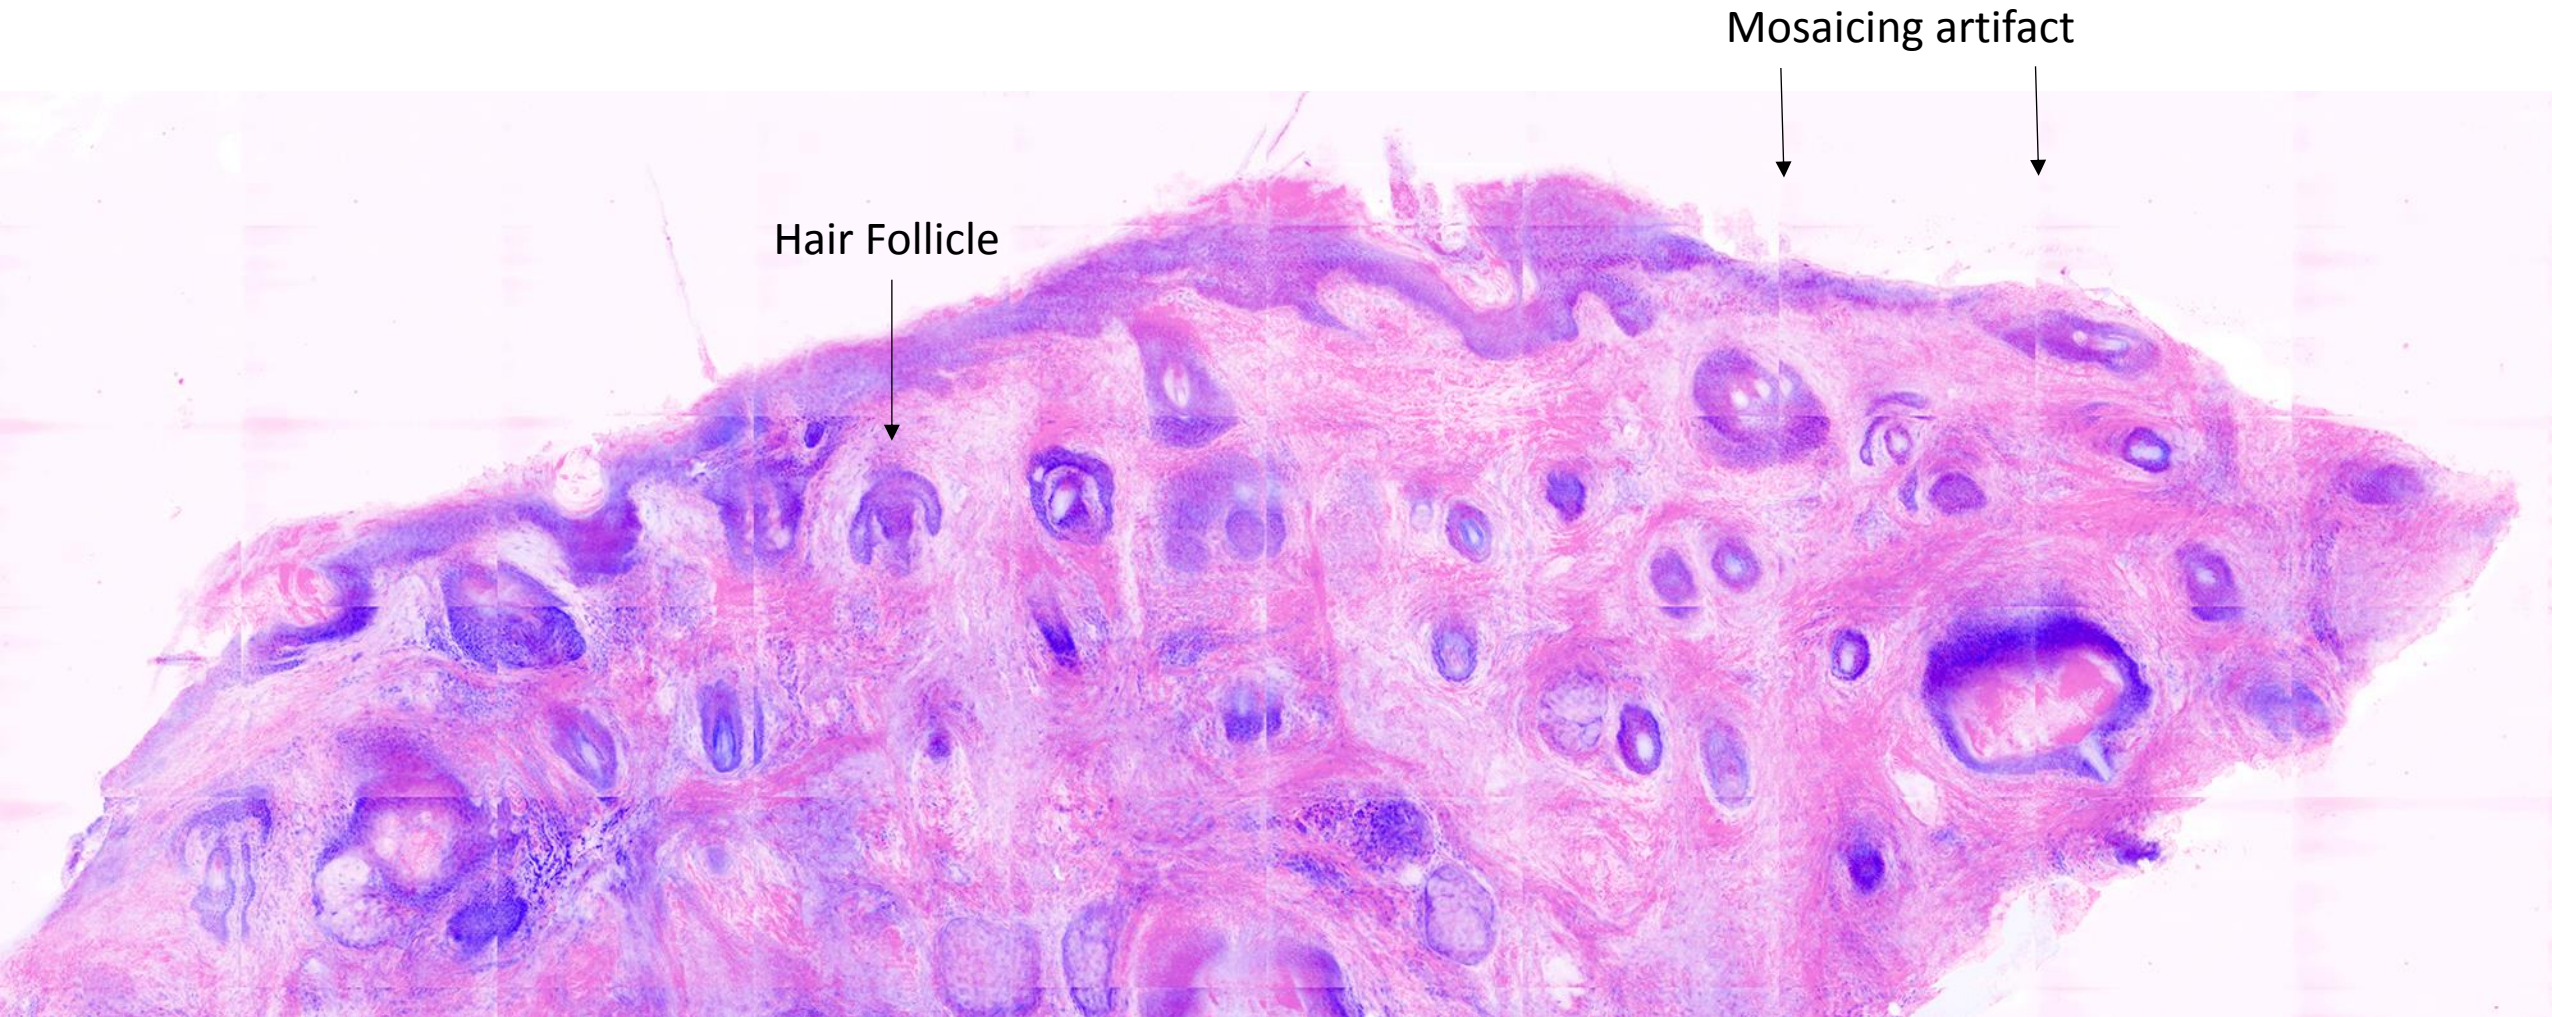

# Basal Cell Carcinoma Example 1

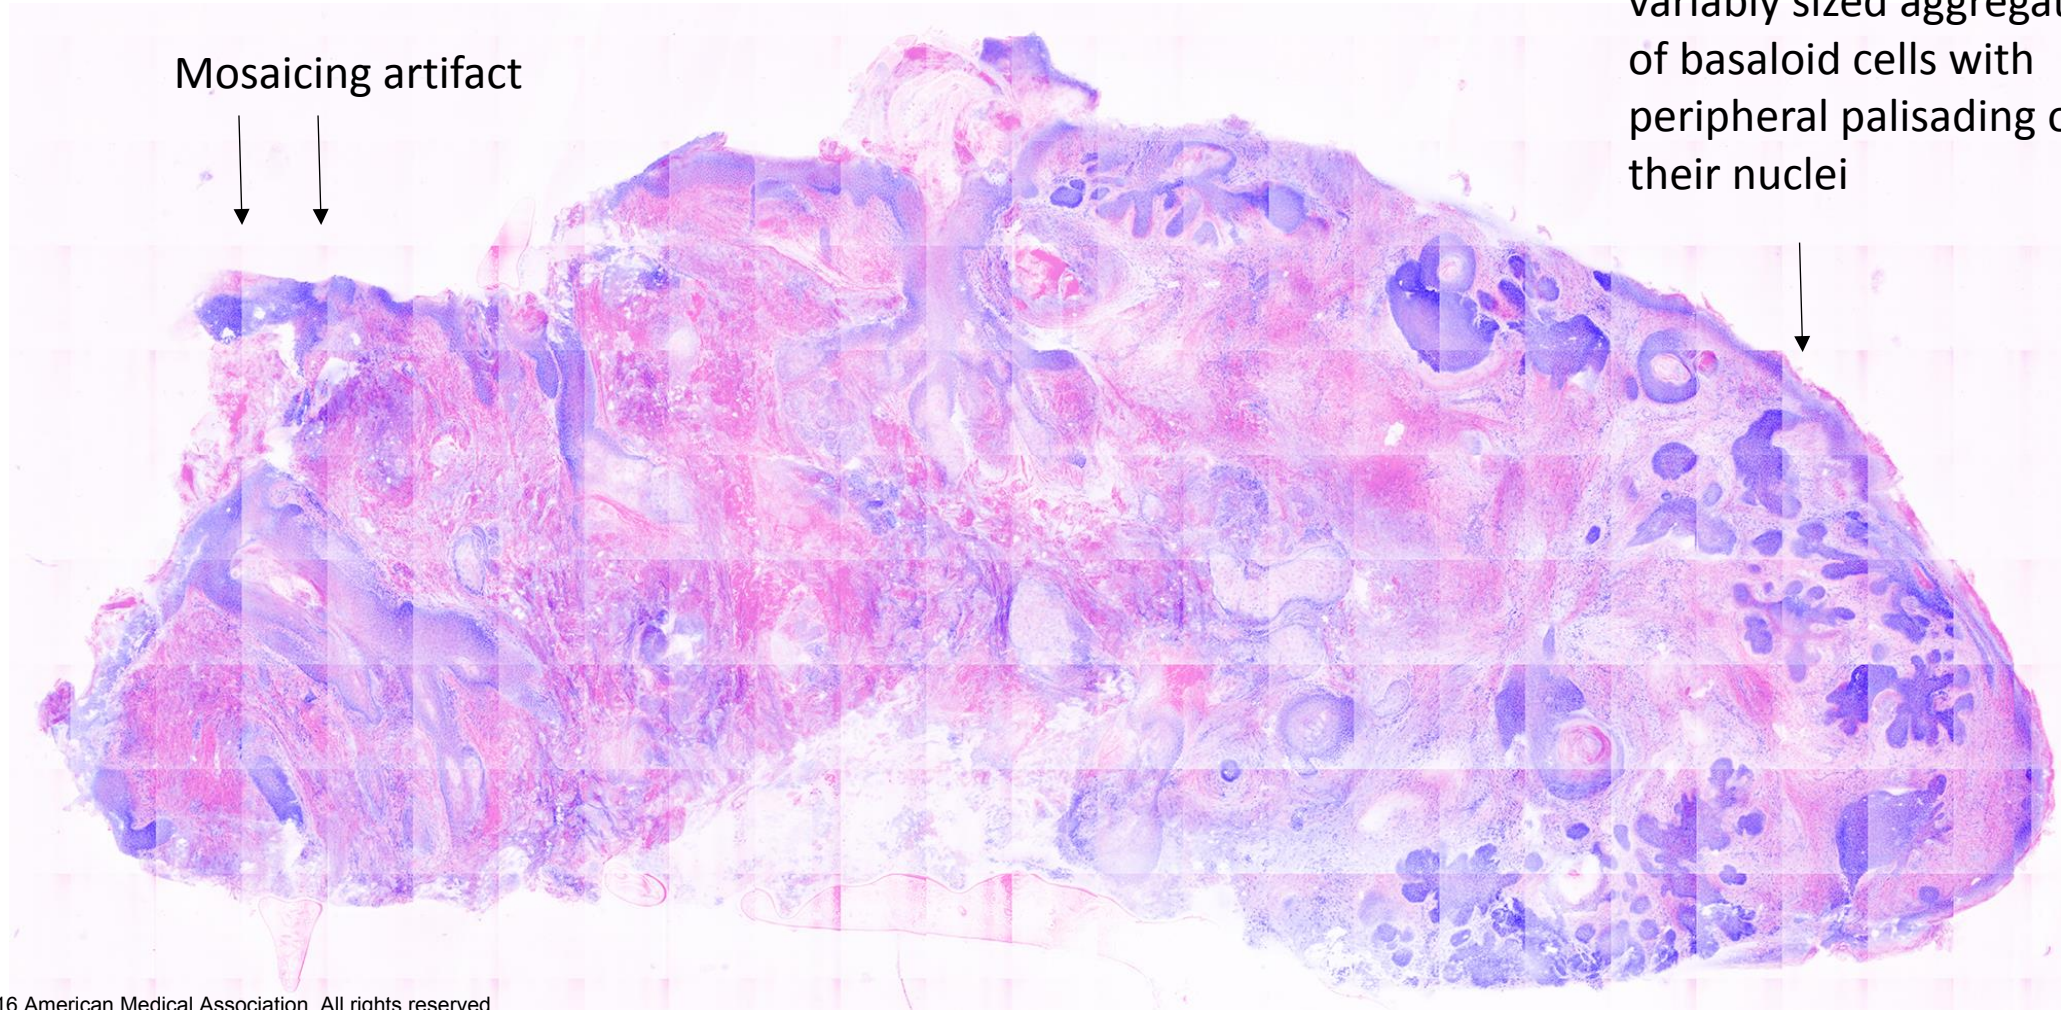

Mosaicing artifact

Basal cell carcinoma:  
variably sized aggregates  
of basaloid cells with  
peripheral palisading of  
their nuclei

# Basal Cell Carcinoma Example 2

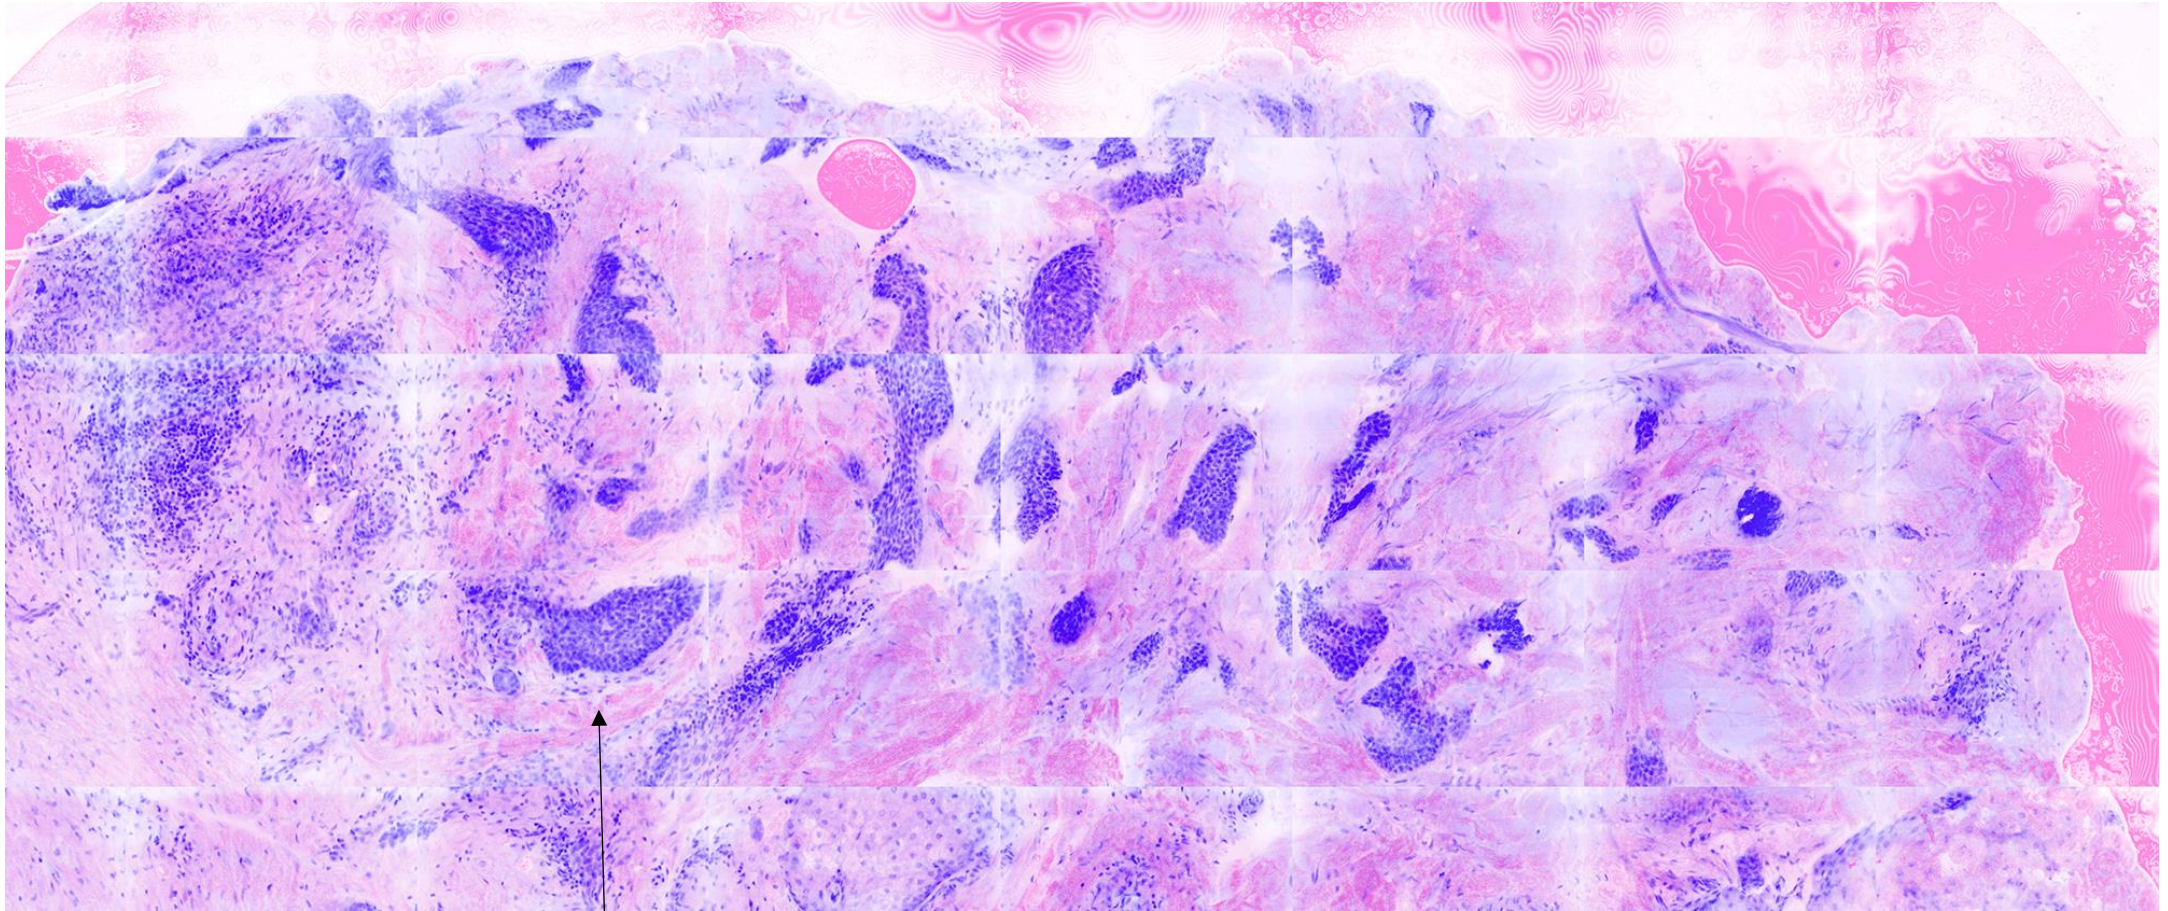

Basal cell carcinoma:

variably sized aggregates of basaloid cells with peripheral palisading of their nuclei

# Squamous Cell Carcinoma Example 1

Squamous cell carcinoma:  
Irregularly shaped aggregates of atypical keratinocytes with squamous pearls

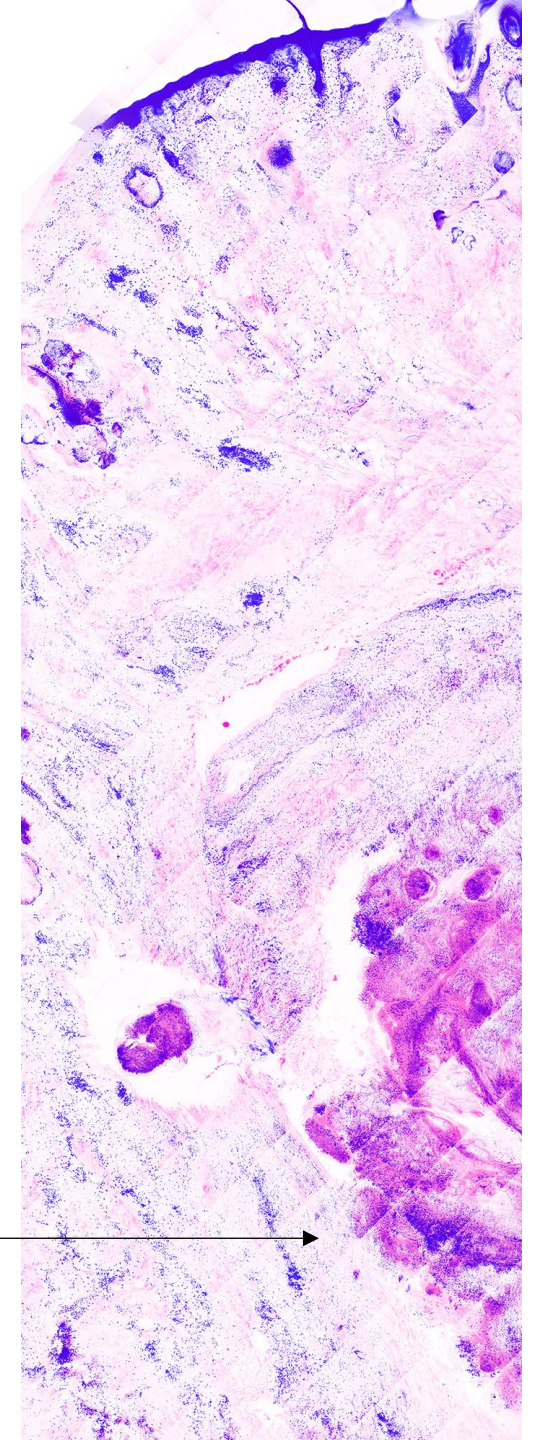

# Squamous Cell Carcinoma Example 2

Squamous cell cancer:  
Irregularly shaped  
aggregates of atypical  
keratinocytes with  
squamous pearls

Mosaicing artifact

Uneven staining

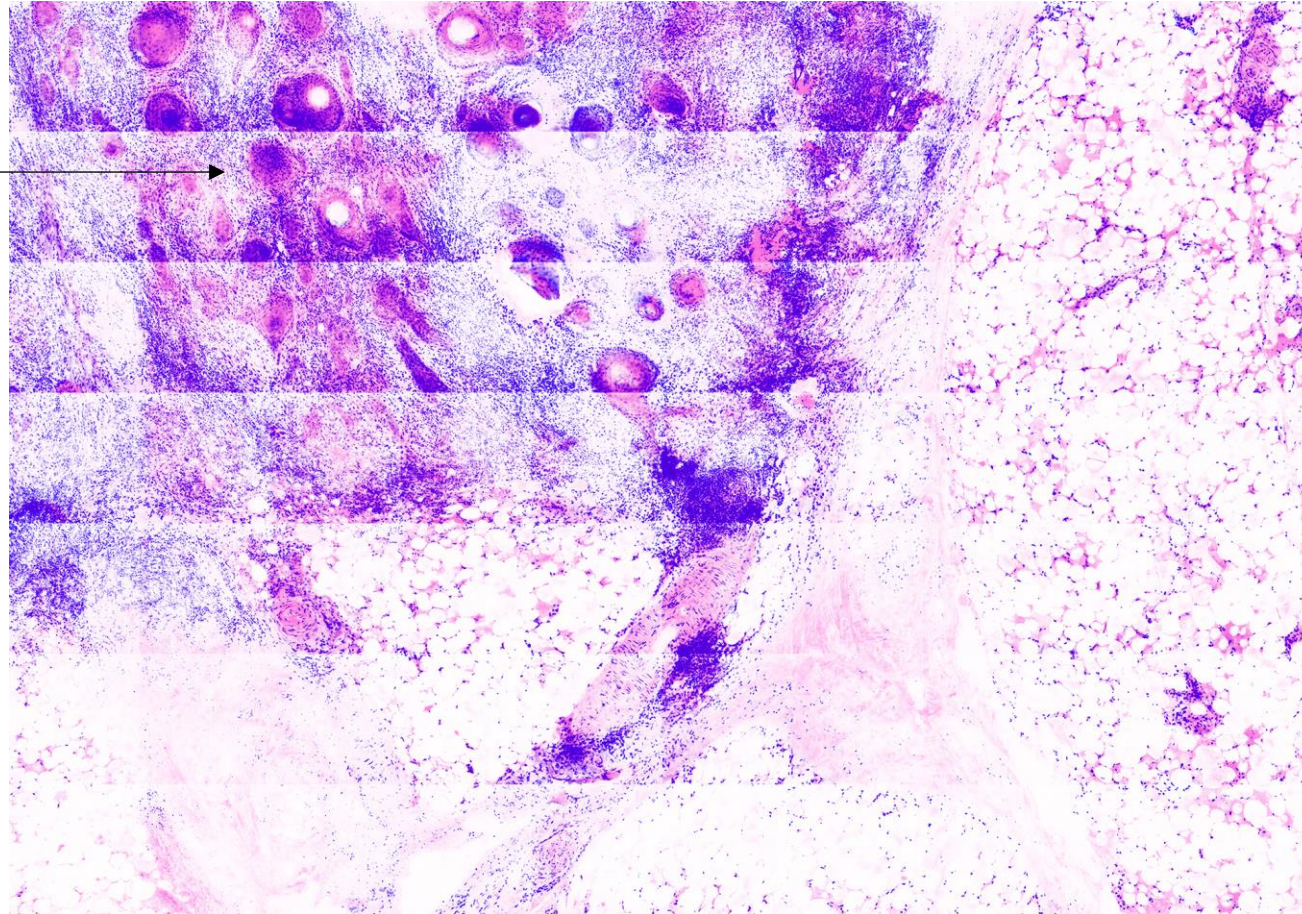

Supplement: NIHMS855526-supplement-Supplemental.pdf [file NIHMS855526-supplement-Supplemental.pdf]
